# Supplementary material for: Co-Occurring Alterations of ERBB2 Exon 20 Insertion in Non-Small Cell Lung Cancer (NSCLC) and the Potential Indicator of Response to Afatinib
Source: Front Oncol. 2020 May 12;10:729. doi: 10.3389/fonc.2020.00729 (PMC7236802; doi:10.3389/fonc.2020.00729)
Supplement: Supplementary file 1 [file Table_1.XLSX]

## Sheet: Sheet1
Table.S1 1021 Cancer related genes in this study
Gene	region
ABCA13	selected regions
ABCB1	selected regions
ABCC1	selected regions
ABCC11	selected regions
ABCC2	selected regions
ABCG2	selected regions
ABL1	whole exon
ABL2	whole exon
ACACA	selected regions
ACIN1	selected regions
ACTB	selected regions
ACTG1	selected regions
ACTG2	selected regions
ACVR1B	whole exon
ACVR2A	selected regions
ACVRL1	selected regions
ADAM29	selected regions
ADAMTS5	selected regions
ADCY1	selected regions
AFF1	selected regions
AFF2	selected regions
AFF3	selected regions
AFF4	selected regions
AHNAK	selected regions
AKAP9	selected regions
AKT1	whole exon
AKT2	whole exon
AKT3	whole exon
ALB	selected regions
ALK	whole exon
AMOT	selected regions
ANGPT1	selected regions
ANK3	selected regions
ANKRD27	selected regions
ANKRD30A	selected regions
ANKRD30B	selected regions
ANKRD36B	selected regions
APC	whole exon
APEX1	selected regions
APOBEC3B	selected regions
AR	whole exon
ARAF	whole exon
ARAP3	selected regions
ARFGEF1	selected regions
ARFGEF2	selected regions
ARHGAP26	selected regions
ARHGAP29	selected regions
ARHGAP35	selected regions
ARID1A	whole exon
ARID1B	whole exon
ARID2	whole exon
ARID4B	selected regions
ARNT	selected regions
ASCL4	selected regions
ASH1L	selected regions
ASMTL	selected regions
ASPM	selected regions
ASTN1	selected regions
ASXL1	whole exon
ASXL2	selected regions
ATIC	selected regions
ATM	whole exon
ATP12A	selected regions
ATP11B	selected regions
ATP1A1	selected regions
ATP2B3	selected regions
ATR	whole exon
ATRX	whole exon
AURKA	whole exon
AURKB	whole exon
AXIN1	whole exon
AXIN2	whole exon
AXL	whole exon
B2M	whole exon
BAP1	whole exon
BARD1	whole exon
BAZ2B	selected regions
BBS9	selected regions
BCAS1	selected regions
BCL11A	selected regions
BCL11B	selected regions
BCL2	whole exon
BCL2A1	selected regions
BCL2L1	whole exon
BCL2L11	selected regions
BCL3	selected regions
BCL9	selected regions
BCLAF1	selected regions
BCOR	whole exon
BCORL1	selected regions
BCR	selected regions
BIRC2	selected regions
BIRC3	selected regions
BLM	whole exon
BMPR1A	whole exon
BMPR2	selected regions
BNC2	selected regions
BPTF	selected regions
BRAF	whole exon
BRCA1	whole exon
BRCA2	whole exon
BRD2	selected regions
BRD3	selected regions
BRD4	whole exon
BRIP1	whole exon
BRSK1	selected regions
BRWD1	selected regions
BTK	whole exon
BTLA	selected regions
BUB1	selected regions
C11orf30	whole exon
C15orf23	selected regions
C15orf55	selected regions
C1QA	selected regions
C1S	selected regions
C3orf70	selected regions
C7orf53	selected regions
C8orf34	selected regions
CACNA1D	selected regions
CACNA1E	selected regions
CADM2	selected regions
CAMTA1	selected regions
CAPN7	selected regions
CARD11	selected regions
CASP1	selected regions
CASP8	whole exon
CASQ2	selected regions
CBFB	whole exon
CBL	whole exon
CBLB	selected regions
CBR1	selected regions
CBR3	selected regions
CCDC168	selected regions
CCNA1	selected regions
CCNB3	selected regions
CCND1	whole exon
CCND2	whole exon
CCND3	whole exon
CCNE1	whole exon
CCT3	selected regions
CCT5	selected regions
CCT6B	selected regions
CD22	selected regions
CD274	whole exon
CD33	selected regions
CD5L	selected regions
CD74	for SV_selected breakpoint region
CDA	selected regions
CDC73	whole exon
CDH1	whole exon
CDH11	selected regions
CDH18	selected regions
CDH23	selected regions
CDK12	whole exon
CDK13	selected regions
CDK4	whole exon
CDK6	whole exon
CDK8	whole exon
CDKN1A	whole exon
CDKN1B	whole exon
CDKN2A	whole exon
CDKN2B	whole exon
CDKN2C	whole exon
CEBPA	whole exon
CHD1	selected regions
CHD1L	selected regions
CHD3	selected regions
CHD4	selected regions
CHD6	selected regions
CHD8	selected regions
CHD9	selected regions
CHEK1	whole exon
CHEK2	whole exon
CHFR	selected regions
CHI3L1	selected regions
CHN1	selected regions
CIC	whole exon
CIITA	selected regions
CKS1B	selected regions
CLCC1	selected regions
CLDN18	selected regions
CLP1	selected regions
CLSPN	selected regions
CLTC	selected regions
CNOT3	selected regions
CNOT4	selected regions
CNTN1	selected regions
CNTN5	selected regions
CNTNAP1	selected regions
CNTNAP5	selected regions
COL1A1	selected regions
COL2A1	selected regions
COL5A1	selected regions
COL5A2	selected regions
COL5A3	selected regions
COPS2	selected regions
CPS1	selected regions
CREB3L1	selected regions
CREBBP	whole exon
CRIPAK	selected regions
CRKL	whole exon
CRLF2	selected regions
CRNKL1	selected regions
CRTC1	selected regions
CRYBG3	selected regions
CSF1	selected regions
CSF1R	whole exon
CSF3R	selected regions
CSMD1	selected regions
CSMD3	selected regions
CSNK1A1	selected regions
CSNK1G3	selected regions
CSNK2A1	selected regions
CTCF	whole exon
CTLA4	selected regions
CTNNA1	whole exon
CTNNA2	selected regions
CTNNB1	whole exon
CTNND1	selected regions
CUL3	whole exon
CUX1	selected regions
CYBA	selected regions
CYLD	whole exon
CYP19A1	selected regions
CYP1B1	selected regions
CYP1A1	selected regions
CYP2A13	selected regions
CYP2C19	selected regions
CYP2C8	selected regions
CYP2D6	selected regions
CYP3A4	selected regions
CYP3A5	selected regions
DAXX	whole exon
DCC	selected regions
DDR1	whole exon
DDR2	whole exon
DDX3X	selected regions
DDX5	selected regions
DEK	selected regions
DHX35	selected regions
DHX9	selected regions
DIAPH1	selected regions
DICER1	whole exon
DIS3L2	selected regions
DLC1	selected regions
DMD	selected regions
DNAH6	selected regions
DNAJC11	selected regions
DNM2	selected regions
DNMT1	selected regions
DNMT3A	whole exon
DOCK2	selected regions
DOCK7	selected regions
DOT1L	selected regions
DPYD	selected regions
DRGX	selected regions
DTX1	selected regions
DUSP22	selected regions
DYSF	selected regions
EBF1	selected regions
ECT2L	selected regions
EEF1A1	selected regions
EGFR	whole exon
EGR3	selected regions
EIF2AK3	selected regions
EIF2C3	selected regions
EIF3A	selected regions
EIF4G3	selected regions
ELAC2	whole exon
ELF1	selected regions
ELF3	selected regions
ELF4	selected regions
ELL	selected regions
ELMO1	selected regions
ELN	selected regions
EME2	whole exon
EMID2	selected regions
EML4	for SV_selected breakpoint region
EP300	whole exon
EPAS1	whole exon
EPC1	selected regions
EPCAM	whole exon
EPHA1	selected regions
EPHA2	whole exon
EPHA3	whole exon
EPHA4	selected regions
EPHA5	whole exon
EPHA7	selected regions
EPHB1	selected regions
EPHB2	whole exon
EPHB4	selected regions
EPHB6	whole exon
EPOR	selected regions
EPPK1	selected regions
EPS15	selected regions
ERBB2	whole exon
ERBB2IP	selected regions
ERBB3	whole exon
ERBB4	whole exon
ERCC1	whole exon
ERCC2	selected regions
ERCC3	whole exon
ERG	whole exon
ERRFI1	whole exon
ESR1	whole exon
ESR2	selected regions
ETS1	selected regions
ETV1	selected regions
ETV5	selected regions
ETV6	selected regions
EWSR1	selected regions
EXT1	whole exon
EXT2	whole exon
EZH2	whole exon
EZR	selected regions
F8	selected regions
FAM123B	whole exon
FAM131B	selected regions
FAM135B	selected regions
FAM157B	selected regions
FAM175A	whole exon
FAM22A	selected regions
FAM46C	selected regions
FAM5C	selected regions
FANCA	whole exon
FANCC	whole exon
FANCD2	whole exon
FANCG	whole exon
FANCM	whole exon
FAP	selected regions
FAS	whole exon
FASLG	selected regions
FAT1	whole exon
FAT2	whole exon
FAT3	selected regions
FAT4	selected regions
FBXW7	whole exon
FCGR1A	selected regions
FCGR2A	whole exon
FCGR2B	selected regions
FCGR3A	whole exon
FCRL4	selected regions
FGF10	selected regions
FGF14	selected regions
FGF23	selected regions
FGF3	selected regions
FGF4	selected regions
FGF6	selected regions
FGFR1	whole exon
FGFR2	whole exon
FGFR3	whole exon
FGFR4	whole exon
FH	whole exon
FKBP5	selected regions
FLCN	whole exon
FLG	selected regions
FLI1	selected regions
FLNC	selected regions
FLT1	whole exon
FLT3	whole exon
FLT4	whole exon
FMN2	selected regions
FMR1	selected regions
FN1	selected regions
FNDC4	selected regions
FOXA1	whole exon
FOXA2	selected regions
FOXL2	whole exon
FOXO3	selected regions
FOXP1	whole exon
FOXQ1	selected regions
FRG1	selected regions
FRMPD4	selected regions
FUBP1	whole exon
FUS	selected regions
FXR1	selected regions
FYN	selected regions
FZD1	selected regions
G3BP1	selected regions
G3BP2	selected regions
GAB2	whole exon
GABRA6	selected regions
GALNT12	whole exon
GATA2	selected regions
GATA3	whole exon
GFRAL	selected regions
GIGYF1	selected regions
GKN2	selected regions
GLB1L3	selected regions
GLI1	selected regions
GLI2	selected regions
GLI3	selected regions
GMPS	selected regions
GNA11	whole exon
GNA12	selected regions
GNA13	selected regions
GNAQ	whole exon
GNAS	whole exon
GNG2	selected regions
GPC3	selected regions
GPR124	selected regions
GPX1	selected regions
GRB7	selected regions
GRIN2A	whole exon
GRM3	selected regions
GSK3B	selected regions
GSTM5	selected regions
GSTP1	selected regions
GUSB	selected regions
H3F3A	selected regions
H3F3C	selected regions
HCLS1	selected regions
HCN1	selected regions
HDAC1	whole exon
HDAC4	whole exon
HDAC9	selected regions
HECW1	selected regions
HERC2	selected regions
HEY1	selected regions
HGF	whole exon
HIP1	selected regions
HIST1H1C	selected regions
HIST1H1D	selected regions
HIST1H1E	selected regions
HIST1H2AC	selected regions
HIST1H2AG	selected regions
HIST1H2AL	selected regions
HIST1H2AM	selected regions
HIST1H2BC	selected regions
HIST1H2BD	selected regions
HIST1H2BJ	selected regions
HIST1H2BK	selected regions
HIST1H2BO	selected regions
HIST1H3B	selected regions
HIST1H4I	selected regions
HLF	selected regions
HMCN1	selected regions
HNF1A	whole exon
HNRPDL	selected regions
HOXA11	selected regions
HOXA13	selected regions
HOXA3	selected regions
HOXA9	selected regions
HOXB13	whole exon
HOXC13	selected regions
HOXD11	selected regions
HOXD13	selected regions
HRAS	whole exon
HSD3B1	selected regions
HSD3B2	selected regions
HSP90AA1	whole exon
HSP90AB1	selected regions
HSPA8	selected regions
HSPD1	selected regions
HSPH1	selected regions
ICK	selected regions
IDH1	whole exon
IDH2	whole exon
IFITM1	selected regions
IFITM3	selected regions
IFNG	whole exon
IFNGR1	whole exon
IGF1R	whole exon
IGF2	selected regions
IGF2R	selected regions
IGLL5	selected regions
IGSF10	selected regions
IKBKE	selected regions
IKZF1	selected regions
IKZF2	selected regions
IKZF3	selected regions
IL1RAPL1	selected regions
IL21R	selected regions
IL6	selected regions
IL6ST	selected regions
IL7R	whole exon
IMPG1	selected regions
ING1	selected regions
INHBA	selected regions
INPP4A	selected regions
INPP4B	whole exon
INPP5D	selected regions
INPPL1	selected regions
IRF2	whole exon
IRF4	selected regions
IRF6	selected regions
IRS2	whole exon
ITGB3	selected regions
ITK	selected regions
ITSN1	selected regions
JAK1	whole exon
JAK2	whole exon
JAK3	whole exon
JARID2	selected regions
KALRN	selected regions
KAT6A	selected regions
KAT6B	selected regions
KCNJ5	selected regions
KCNQ2	selected regions
KDM2B	selected regions
KDM3B	selected regions
KDM5A	whole exon
KDM5C	whole exon
KDM6A	whole exon
KDR	whole exon
KEAP1	whole exon
KEL	selected regions
KIF5B	selected regions
KIT	whole exon
KLB	selected regions
KLF4	selected regions
KLHL6	selected regions
KLK1	selected regions
KRAS	whole exon
KRTAP5-5	selected regions
L3MBTL1	selected regions
LAMA2	selected regions
LCP1	selected regions
LEF1	selected regions
LGALS8	selected regions
LIFR	selected regions
LPHN2	selected regions
LPP	selected regions
LRP1B	whole exon
LRP2	selected regions
LRP4	selected regions
LRP5	selected regions
LRP6	selected regions
LRRC7	selected regions
LRRK2	selected regions
LYN	selected regions
LZTS1	selected regions
MACF1	selected regions
MAD1L1	selected regions
MAGI2	selected regions
MAGOH	selected regions
MAML2	selected regions
MAML3	selected regions
MAP2K1	whole exon
MAP2K2	whole exon
MAP2K4	whole exon
MAP3K1	whole exon
MAP3K13	selected regions
MAPK1	whole exon
MAPK3	selected regions
MAX	whole exon
MCC	selected regions
MCL1	whole exon
MCM3	selected regions
MDH2	selected regions
MDM2	whole exon
MDM4	whole exon
MECOM	selected regions
MED12	whole exon
MEF2C	selected regions
MEN1	whole exon
MET	whole exon
MGA	selected regions
MIB1	selected regions
MIOS	selected regions
MITF	whole exon
MKI67	selected regions
MKL1	selected regions
MLH1	whole exon
MLH3	whole exon
MLL	whole exon
MLL2	whole exon
MLL3	whole exon
MLL4	selected regions
MLLT3	selected regions
MLLT6	selected regions
MMP2	selected regions
MMP11	selected regions
MN1	selected regions
MNDA	selected regions
MNX1	selected regions
MPL	whole exon
MPO	selected regions
MRE11A	whole exon
MS4A1	whole exon
MSH2	whole exon
MSH3	whole exon
MSH4	selected regions
MSH6	whole exon
MSN	selected regions
MSR1	selected regions
MTHFR	selected regions
MTOR	whole exon
MTRR	selected regions
MUC5B	selected regions
MUTYH	whole exon
MYB	selected regions
MYBL2	selected regions
MYC	whole exon
MYCL1	whole exon
MYCN	whole exon
MYD88	whole exon
MYH10	selected regions
MYH11	selected regions
MYH14	selected regions
MYH9	selected regions
MYO3A	selected regions
NAP1L1	selected regions
NAV3	selected regions
NBN	whole exon
NBPF1	selected regions
NCAM2	selected regions
NCF2	selected regions
NCF4	selected regions
NCK1	selected regions
NCOA2	selected regions
NCOA4	for SV_selected breakpoint region
NCOR1	whole exon
NCOR2	selected regions
NCSTN	selected regions
NDRG1	selected regions
NDUFA13	whole exon
NEB	selected regions
NF1	whole exon
NF2	whole exon
NFATC4	selected regions
NFE2L2	selected regions
NFE2L3	selected regions
NIN	selected regions
NKX3-1	selected regions
NLRC3	selected regions
NOD1	selected regions
NOS3	selected regions
NOTCH1	whole exon
NOTCH2	whole exon
NOTCH3	whole exon
NOTCH4	whole exon
NPM1	whole exon
NQO1	selected regions
NR1I2	selected regions
NR2F2	selected regions
NR4A2	selected regions
NRAS	whole exon
NRP2	selected regions
NRXN1	selected regions
NSD1	whole exon
NTHL1	whole exon
NTM	selected regions
NTRK1	whole exon
NTRK2	selected regions
NTRK3	whole exon
NUMA1	selected regions
NUP107	selected regions
NUP210	selected regions
NUP98	selected regions
OBSCN	selected regions
OGDH	selected regions
OMD	selected regions
OPCML	selected regions
OR11G2	selected regions
OR2T4	selected regions
OR4A15	selected regions
OR4C6	selected regions
OR5L2	selected regions
OR6F1	selected regions
P2RY8	selected regions
P4HB	selected regions
PABPC1	selected regions
PABPC3	selected regions
PAG1	selected regions
PAK1	selected regions
PAK3	selected regions
PALB2	whole exon
PARK2	selected regions
PARP1	selected regions
PASK	selected regions
PAX3	selected regions
PAX5	whole exon
PAX7	selected regions
PBRM1	whole exon
PBX1	selected regions
PC	selected regions
PCDH18	selected regions
PCK1	whole exon
PCLO	selected regions
PCSK6	selected regions
PCSK7	selected regions
PDCD1	selected regions
PDCD11	selected regions
PDCD1LG2	whole exon
PDE4DIP	selected regions
PDGFB	selected regions
PDGFRA	whole exon
PDGFRB	whole exon
PDILT	selected regions
PDK1	whole exon
PER1	selected regions
PGR	selected regions
PHF1	selected regions
PHF6	whole exon
PIK3C2A	selected regions
PIK3C2B	selected regions
PIK3C2G	selected regions
PIK3CA	whole exon
PIK3CB	whole exon
PIK3CG	whole exon
PIK3R1	whole exon
PIK3R2	whole exon
PIK3R3	selected regions
PIP5K1A	selected regions
PKD1L2	selected regions
PKHD1	selected regions
PLAC8	selected regions
PLAG1	selected regions
PLCB1	selected regions
PLCG1	selected regions
PLCG2	selected regions
PLK1	selected regions
PLXNA1	selected regions
PLXNB2	selected regions
PMS1	whole exon
PMS2	whole exon+promotor
POLD1	whole exon
POLE	whole exon
POLQ	selected regions
POLR2B	selected regions
POM121	selected regions
POM121L12	selected regions
POT1	whole exon
POTEG	selected regions
POU2AF1	selected regions
PPARG	for SV_selected breakpoint region
PPM1D	whole exon
PPP1R17	selected regions
PPP2R1A	selected regions
PPP6C	selected regions
PRAM1	selected regions
PRDM1	selected regions
PRDM16	selected regions
PREX2	selected regions
PRF1	selected regions
PRKAA1	selected regions
PRKAR1A	whole exon
PRKCB	selected regions
PRKCI	selected regions
PRKDC	selected regions
PRRX1	selected regions
PRX	selected regions
PSG2	selected regions
PSIP1	selected regions
PSMB1	selected regions
PSMB5	selected regions
PTCH1	whole exon
PTCH2	whole exon
PTEN	whole exon
PTGS1	selected regions
PTGS2	selected regions
PTK2	selected regions
PTPN11	whole exon
PTPN13	selected regions
PTPN2	selected regions
PTPRB	selected regions
PTPRD	selected regions
PTPRF	selected regions
PTPRJ	selected regions
PTPRK	selected regions
PTPRO	selected regions
PTPRT	selected regions
PTPRU	selected regions
RAB35	selected regions
RAC1	selected regions
RAC2	selected regions
RAD21	selected regions
RAD50	whole exon
RAD51	whole exon
RAD51B	whole exon
RAD51C	whole exon
RAD51D	whole exon
RAD54B	selected regions
RAF1	whole exon
RANBP2	selected regions
RARA	whole exon
RASA1	selected regions
RASGRP1	selected regions
RB1	whole exon
RBL1	selected regions
RBM10	whole exon
RECQL4	selected regions
REL	selected regions
RELN	selected regions
RET	whole exon
RFC1	selected regions
RGS3	selected regions
RHEB	whole exon
RHOA	whole exon
RHOH	selected regions
RHOT1	selected regions
RICTOR	whole exon
RINT1	whole exon
RIT1	selected regions
RNASEL	whole exon
RNF213	selected regions
RNF43	whole exon
ROBO1	selected regions
ROBO2	selected regions
ROBO3	selected regions
ROCK1	selected regions
ROS1	whole exon
RPGR	selected regions
RPL22	selected regions
RPS6KB1	whole exon
RPTOR	selected regions
RSPO2	selected regions
RSPO3	selected regions
RUNX1	whole exon
RUNX1T1	selected regions
RUNX2	selected regions
RXRA	selected regions
RYR1	selected regions
RYR2	selected regions
SBDS	selected regions
SCUBE2	selected regions
SDHA	whole exon
SDHAF2	whole exon
SDHB	whole exon
SDHC	whole exon
SDHD	whole exon
SEC31A	selected regions
SEMA3A	selected regions
SEMA3E	selected regions
SEMA6A	selected regions
SERP2	selected regions
SERPINA7	selected regions
SERPINB3	whole exon
SERPINB4	whole exon
SETBP1	selected regions
SETD2	whole exon
SETDB1	selected regions
SF1	selected regions
SF3A1	selected regions
SF3A3	selected regions
SF3B1	selected regions
SFPQ	selected regions
SGCZ	selected regions
SH3PXD2A	selected regions
SHH	selected regions
SI	selected regions
SIN3A	selected regions
SLC16A1	selected regions
SLC1A2	selected regions
SLC22A16	selected regions
SLC22A18	selected regions
SLC22A2	selected regions
SLC22A3	selected regions
SLC34A2	for SV_selected breakpoint region
SLCO1B3	selected regions
SLIT1	selected regions
SLIT2	selected regions
SLX4	whole exon
SMAD2	whole exon
SMAD3	selected regions
SMAD4	whole exon
SMARCA4	whole exon
SMARCB1	whole exon
SMARCE1	whole exon
SMC1A	selected regions
SMC1B	selected regions
SMO	whole exon
SMURF2	selected regions
SNCAIP	selected regions
SNTG1	selected regions
SNX29	selected regions
SOD2	selected regions
SOS1	selected regions
SOX10	selected regions
SOX17	selected regions
SOX2	whole exon
SOX9	whole exon
SPEN	selected regions
SPOP	selected regions
SPRR3	selected regions
SPSB4	selected regions
SPTA1	selected regions
SRC	whole exon
SRD5A2	selected regions
SRGAP1	selected regions
SRGAP3	selected regions
SRSF2	selected regions
SRSF7	selected regions
SSX1	selected regions
STAG1	selected regions
STAG2	whole exon
STAT1	selected regions
STAT3	whole exon
STAT5A	selected regions
STK11	whole exon
SUCLG1	selected regions
SUCLG2	selected regions
SUFU	whole exon
SULT1A1	selected regions
SUZ12	selected regions
SVEP1	selected regions
SYK	whole exon
SYNCRIP	selected regions
SYNE1	selected regions
TAF1	selected regions
TAF15	selected regions
TAF1L	selected regions
TAL1	selected regions
TBL1XR1	selected regions
TBX15	selected regions
TBX22	selected regions
TBX3	whole exon
TCEB1	selected regions
TCERG1	selected regions
TCF12	selected regions
TCF3	selected regions
TCF4	selected regions
TCF7L2	whole exon
TCL1A	selected regions
TCP11	selected regions
TEC	selected regions
TENM3	selected regions
TERT	selected regions_promotor
TET2	whole exon
TFDP1	selected regions
TFDP2	selected regions
TFE3	selected regions
TGFBR1	selected regions
TGFBR2	whole exon
TGFBR3	selected regions
TGM2	selected regions
THBS1	selected regions
THBS2	selected regions
THRAP3	selected regions
TJP1	selected regions
TLE1	selected regions
TLL2	selected regions
TLR4	selected regions
TLX3	selected regions
TMEM127	whole exon
TMEM132D	selected regions
TMPRSS2	whole exon
TNFAIP3	whole exon
TNN	selected regions
TNPO1	selected regions
TOP1	whole exon
TOP2A	whole exon
TOP2B	selected regions
TP53	whole exon
TP53BP1	selected regions
TP63	selected regions
TP73	whole exon
TPM3	selected regions
TPR	selected regions
TRAF5	selected regions
TRERF1	selected regions
TRIM24	selected regions
TRIM58	selected regions
TRIO	selected regions
TRPC5	selected regions
TRRAP	selected regions
TSC1	whole exon
TSC2	whole exon
TSHR	selected regions
TSHZ2	selected regions
TSHZ3	selected regions
TTF1	selected regions
TTL	selected regions
TUBA3C	selected regions
TUBB3	selected regions
TUSC3	selected regions
TXNIP	selected regions
TYMS	selected regions
TYR	selected regions
TYRP1	selected regions
U2AF1	selected regions
UBE2D2	selected regions
UBR5	selected regions
UGT1A1	selected regions
UMPS	selected regions
UPF3B	selected regions
USH2A	selected regions
USP6	selected regions
USP8	selected regions
VDAC2	selected regions
VEGFA	whole exon
VEZF1	selected regions
VHL	whole exon
VIM	selected regions
WASF3	selected regions
WDR90	selected regions
WDTC1	selected regions
WHSC1	selected regions
WHSC1L1	selected regions
WIPF1	selected regions
WNK1	selected regions
WNT5A	selected regions
WSCD2	selected regions
WT1	whole exon
WWOX	selected regions
WWP1	selected regions
WWP2	selected regions
XBP1	selected regions
XPC	selected regions
XPO1	whole exon
XRCC1	selected regions
XRCC2	whole exon
XRCC3	whole exon
YBX1	selected regions
YY1AP1	selected regions
ZBTB16	selected regions
ZC3H11A	selected regions
ZFHX3	whole exon
ZFP36L1	selected regions
ZFP36L2	selected regions
ZFPM2	selected regions
ZIC3	selected regions
ZMAT3	whole exon
ZNF217	selected regions
ZNF384	selected regions
ZNF521	selected regions
ZNF638	selected regions
ZNF750	selected regions
ZNF804B	selected regions
ZNF814	selected regions

## Sheet: Sheet2
Table.S1 59 Cancer related genes in this study
Gene	region
AKT1	selected regions
ALK	whole exon
APC	selected regions
AR	selected regions
ATM	whole exon
BCL2L11(BIM)	selected regions
BRAF	whole exon
BRCA1	whole exon
BRCA2	whole exon
CCND1	whole exon
CDK4	whole exon
CDK6	whole exon
CDKN2A	whole exon
CTNNB1	selected regions
CYP2D6	selected regions
DDR2	whole exon
EGFR	whole exon
ERBB2	whole exon
ESR1	selected regions
FBXW7	whole exon
FGFR1	whole exon
FGFR2	selected regions
FGFR3	selected regions
FLT3	selected regions
HRAS	selected regions
IDH1	selected regions
IDH2	selected regions
JAK2	selected regions
KIT	whole exon
KRAS	whole exon
MAP2K1	whole exon
MAP2K2	selected regions
MET	whole exon
MLH1	whole exon
MSH2	whole exon
MSH6	whole exon
MTOR	selected regions
NF1	whole exon
NRAS	whole exon
NTRK1	whole exon
PDGFRA	selected regions
PIK3CA	whole exon
PMS2	whole exon
PTCH1	whole exon
PTEN	whole exon
PTPN11	selected regions
RAF1	selected regions
RB1	whole exon
RET	whole exon
ROS1	whole exon
SMARCA4	whole exon
SMO	whole exon
SRC	selected regions
STK11	whole exon
TP53	whole exon
TSC1	whole exon
TSC2	whole exon
UGT1A1	selected regions
VHL	selected regions
